# Supplementary material for: High-pressure effects on the electronic properties and photoluminescence of Ag-doped CsCu2I3
Source: Royal Society of Chemistry journal article supplement (doi:10.1039/d4cp01142b), 2024-01-01
Supplement: d4cp01142b1.pdf [file d4cp01142b1.pdf]

Supporting Information

# High-pressure effects on the electronic properties and photoluminescence of Ag-doped $\text{CsCu}_2\text{I}_3$

Zan Dou<sup>1#</sup>, Zihua Lin<sup>1#</sup>, Rong Wang<sup>2</sup>, Mengmeng Han<sup>3</sup>, Jianxu Ding<sup>4</sup>, Haoyu Wang<sup>1</sup>, Xiaoguang Luo<sup>1</sup>, Yingchun Cheng<sup>2\*</sup>, Nannan Han<sup>1\*</sup>

<sup>1</sup>Frontiers Science Center for Flexible Electronics, Institute of Flexible Electronics (IFE), Northwestern Polytechnical University, 127 West Youyi Road, Xi'an 710072, China

<sup>2</sup>Key Laboratory of Flexible Electronics & Institute of Advanced Materials, Jiangsu National Synergetic Innovation Center for Advanced Materials, Nanjing Tech University, 30 South Puzhu Road, Nanjing 211816, China

<sup>3</sup>China Petroleum Engineering & Construction Corp. North China Company, Middle Jianshe Road, Renqiu 062552, China

<sup>4</sup>College of Materials Science and Engineering, Shandong University of Science and Technology, Qingdao266590, China

\*Email: iamyccheng@njtech.edu.cn, iamnnhan@nwpu.edu.cn

#Z. D. and Z. L. contributed equally to this work.

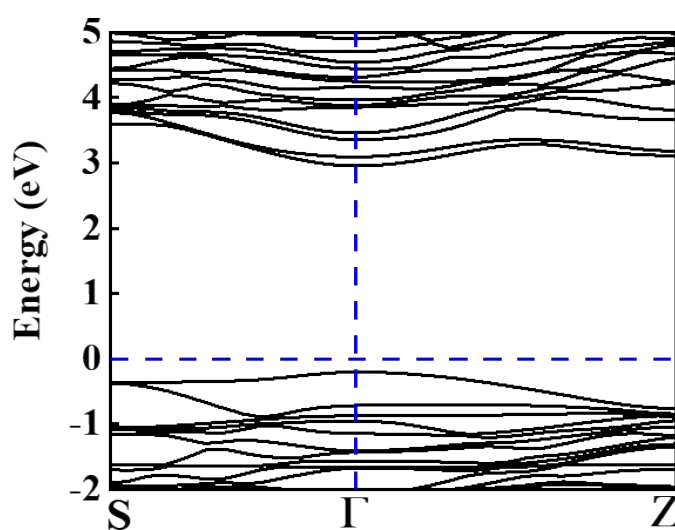

Figure S1. Band structure of the *cmcm* phase of 10% Ag doped  $\text{CsCu}_2\text{I}_3$  at 7.5 GPa.

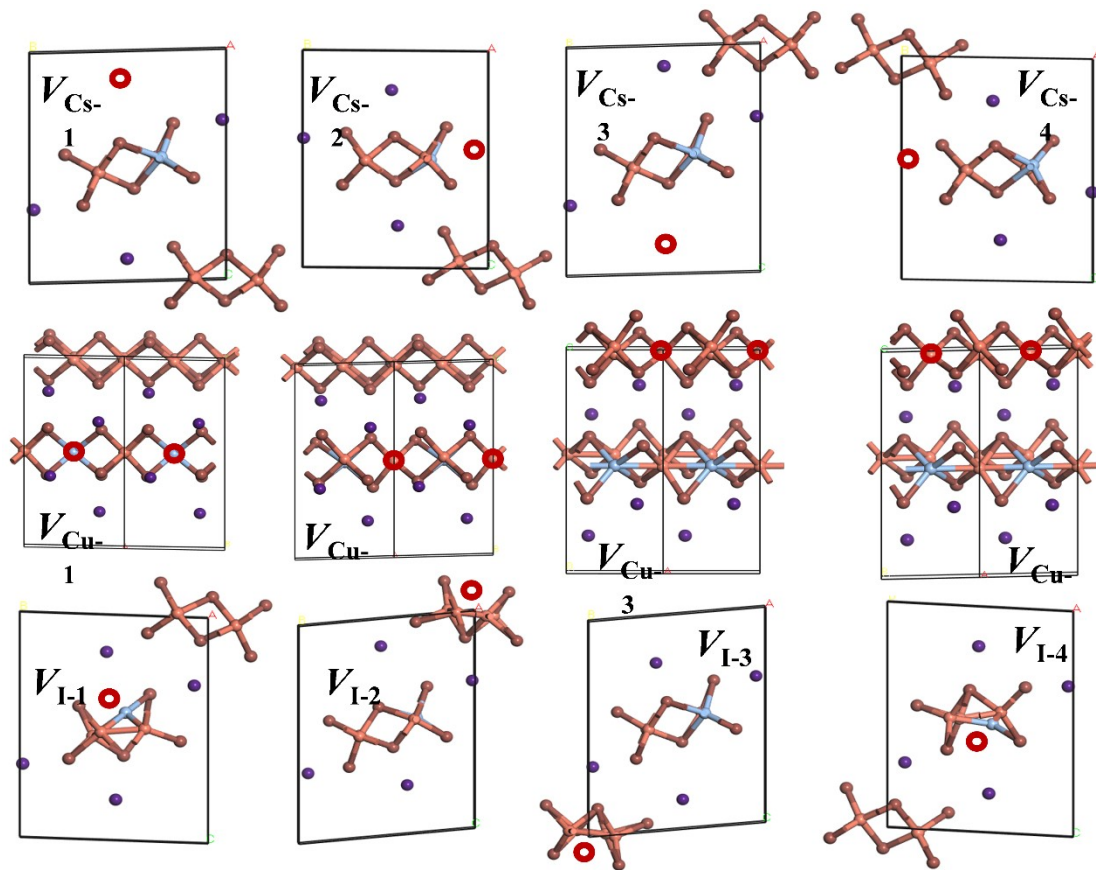

Figure S2. Structural diagram of the systems with vacancy defects. The circle shown is the location of the defects.

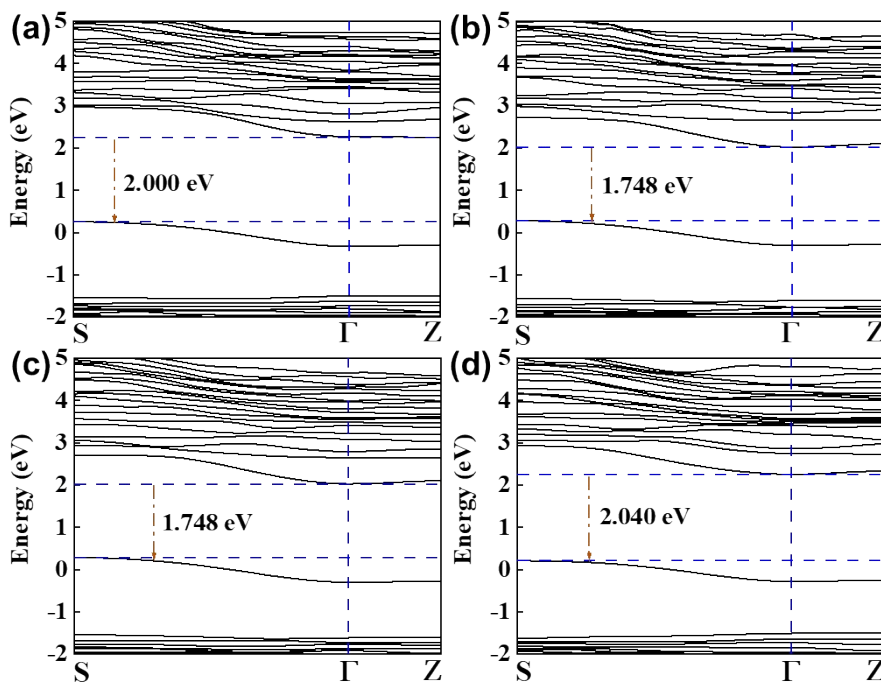

Figure S3. Band structure of 10% Ag doped  $\text{CsCu}_2\text{I}_3$  system with four different

position I vacancies with position (a) 1, (b) 2, (c) 3, (d) 4.
